# Supplementary material for: Antigenic and 3D structural characterization of soluble X4 and hybrid X4-R5 HIV-1 Env trimers
Source: Retrovirology. 2014 May 30;11:42. doi: 10.1186/1742-4690-11-42 (PMC4048260; doi:10.1186/1742-4690-11-42)
Supplement: Additional file 5 — Dissociation constants derived from the ELISA antibody binding experiments of the gp140 constructs. [file 1742-4690-11-42-S5.xlsx]

## Sheet: Tabelle1
Additional file 5: Dissociation constants derived from the ELISA antibody binding experiments of the gp140 constructs.
antibody	KD [pM] ± SD
	NL4-3	ADA	NL4-3/ADA
D19	9 ± 3	49 ± 19	34 ± 24
447-52D	359 ± 166	347 ± 184	113 ± 54
CD4-Fc	5213 ± 120	3281 ± 1716	5172 ± 3888
VRC01	4512 ± 707	n.a.	n.a.
b12	136 ± 56	129 ± 27	n.a.
b13	761 ± 93	1835 ± 90	2018 ± 390
F105	899 ± 193	1149 ± 413	n.a.
CG10 +CD4	318 ± 169	211 ± 107	n.a.
17b + CD4	1059 ± 99	599 ± 118	n.a.
17b – CD4	2158 ± 293	3574 ± 230	n.a.
Md-1	0.34 ± 0.06 (#)	0.21 ± 0.04 (#))	0.27 ± 0.05 (#)
2F5	821 ± 59	1073 ± 276	1938 ± 492
246-D	194 ± 128	140 ± 43	177 ±57
Nonlinear regression fits were deduced from the antibody binding curves of the NL4-3, ADA and NL4-3/ADA gp140 constructs and KD values were calculated with PRISM software. The mean dissociation constants (KD) from at least 3 replicate ELISA experiments and the respective standard deviations (SD) are indicated in [pM] or for the unpurified mAb Md-1(#) in [x * 1/1000] (n.a.: not applicable).
