# Supplementary material for: Antigenic and 3D structural characterization of soluble X4 and hybrid X4-R5 HIV-1 Env trimers
Source: Retrovirology. 2014 May 30;11:42. doi: 10.1186/1742-4690-11-42 (PMC4048260; doi:10.1186/1742-4690-11-42)
Supplement: Additional file 6 — SPR binding and dissociation kinetics of the gp140 constructs to 447-52D mAb. [file 1742-4690-11-42-S6.xlsx]

## Sheet: Tabelle1
Additional file 6: SPR binding and dissociation kinetics of the gp140 constructs to 447-52D mAb.
	KD [M] ± SD	kon [1/Ms] ± SD	koff [1/s] ± SD
NL4-3	2.2 x 10-8 ± 3.2 x 10-8	1.3 x 105 ± 1.0 x 105	6.5 x 10-4 ± 1.7 x 10-4
ADA	6.1 x 10-9 ± 2.8 x 10-9	1.0 x 105 ± 5.3 x 104	5.0 x 10-4 ± 1.1 x 10-4
NL4-3/ADA	1.2 x 10-9 ± 2.3 x 10-10	7.9 x 104 ± 1.6 x 104	8.8 x 10-5 ± 2.0 x 10-5
The mean dissociation constants (KD in [M]), association rates (kon in [1/Ms]) and dissociation rates (koff in [1/s]) from 3 replicate SPR experiments (Biorad ProteOn XPR36 system) and the respective standard deviations (SD) are indicated.
